# Supplementary material for: Developing Air Concentration and Velocity Probes for Measuring Highly-Aerated, High-Velocity Flow
Source: Frontiers journal article supplement (doi:10.3389/fpsyg.2022.911854), 1994-01-01
Supplement: Data_Sheet_1.PDF [file Data_Sheet_1.PDF]

## *Supplementary Material*

**Table 1**

*Overview of fundamental frequency ( $f_0$ ), minimum pitch, maximum pitch, and pitch range for all stimuli.*

| Stimulus | $f_0$  | Minimum pitch | Maximum pitch | Pitch range |
|----------|--------|---------------|---------------|-------------|
| 006_M    | 171.36 | 120.29        | 237.12        | 116.82      |
| 035_M    | 179.37 | 146.42        | 221.19        | 74.78       |
| 012_M    | 182.02 | 131.34        | 236.25        | 104.92      |
| 014_M    | 196.70 | 102.15        | 262.37        | 160.21      |
| 026_M    | 198.46 | 164.64        | 572.99        | 408.36      |
| 013_M    | 205.47 | 156.60        | 243.92        | 87.32       |
| 023_M    | 209.81 | 170.89        | 261.06        | 90.17       |
| 031_M    | 214.12 | 108.62        | 262.43        | 153.81      |
| 024_M    | 214.32 | 190.17        | 251.20        | 61.04       |
| 004_M    | 214.63 | 103.50        | 258.98        | 155.49      |
| 011_M    | 218.04 | 162.27        | 352.43        | 190.16      |
| 027_M    | 218.29 | 109.73        | 346.41        | 236.68      |
| 032_M    | 222.29 | 102.57        | 578.15        | 475.58      |
| 009_M    | 226.31 | 160.03        | 527.97        | 367.94      |
| 010_M    | 228.98 | 145.31        | 480.75        | 335.45      |
| 015_M    | 229.79 | 188.52        | 579.71        | 391.19      |
| 005_M    | 233.03 | 170.76        | 598.56        | 427.80      |
| 034_M    | 251.08 | 100.87        | 438.22        | 337.35      |
| 019_M    | 253.24 | 153.94        | 597.20        | 443.27      |
| 020_M    | 266.78 | 145.14        | 356.23        | 211.09      |

*Note:*  $F_0$  is calculated as the mean of  $f_0$  from one of the voice recordings, the minimum and the maximum pitch are the minimum/maximum values from one of the voice recordings. The pitch range is calculated as the difference between minimum and maximum voice pitch. Stimulus names are aligned/matched with the ViTaFa stimulus names in order to assign them.

**Table 2**

Overview of the applied models for all ratings in the both blocks. Included models are shown in bold.

**a) Audio block**

| Rating         | Model term                                                                                         | Final null model                                                                | Exclusion criterium                                            |
|----------------|----------------------------------------------------------------------------------------------------|---------------------------------------------------------------------------------|----------------------------------------------------------------|
| Attractiveness | <code>lmer(rating ~condition + (1+condition subject_nr) + (1+condition stimulus_nr))</code>        | <code>lmer(rating ~(1+condition subject_nr) + (1+condition stimulus_nr))</code> | included                                                       |
| Femininity     | <code>lmer(rating ~condition + (1+condition subject_nr) + (1+condition stimulus_nr))</code>        |                                                                                 | Failed to converge (stimulus_nr shows correlation of 1)        |
|                | <b><code>lmer(rating ~condition + (1+condition subject_nr))</code></b>                             | <code>lmer(rating ~(1+condition subject_nr))</code>                             | included                                                       |
| Health         | <code>lmer(rating ~condition + (1+condition subject_nr) + (1+condition stimulus_nr))</code>        |                                                                                 | Boundary fit (overfitting; stimulus_nr shows correlation of 1) |
|                | <b><code>lmer(rating ~condition + (1+condition subject_nr))</code></b>                             | <code>lmer(rating ~(1+condition subject_nr))</code>                             | included                                                       |
| Age            | <b><code>lmer(rating ~condition + (1+condition subject_nr) + (1+condition stimulus_nr))</code></b> | <code>lmer(rating ~(1+condition subject_nr) + (1+condition stimulus_nr))</code> | included                                                       |

**b) Video block**

| Rating         | Model term                                                                                  | Final null model | Exclusion criterium                                            |
|----------------|---------------------------------------------------------------------------------------------|------------------|----------------------------------------------------------------|
| Attractiveness | <code>lmer(rating ~condition + (1+condition subject_nr) + (1+condition stimulus_nr))</code> |                  | Boundary fit (overfitting; stimulus_nr shows correlation of 1) |

|            |                                                                                      |                                                  |                                                                            |
|------------|--------------------------------------------------------------------------------------|--------------------------------------------------|----------------------------------------------------------------------------|
|            | <b>lmer(rating ~condition +<br/>(1+condition subject_nr)</b>                         | <b>lmer(rating<br/>~(1+condition subject_nr)</b> | included                                                                   |
| Femininity | lmer(rating ~condition +<br>(1+condition subject_nr) +<br>(1+condition stimulus_nr)) |                                                  | Boundary fit<br>(overfitting;<br>stimulus_nr<br>shows correlation<br>of 1) |
|            | <b>lmer(rating ~condition +<br/>(1+condition subject_nr)</b>                         | <b>lmer(rating<br/>~(1+condition subject_nr)</b> | included                                                                   |
| Health     | lmer(rating ~condition +<br>(1+condition subject_nr) +<br>(1+condition stimulus_nr)) |                                                  | Boundary fit<br>(overfitting;<br>stimulus_nr<br>shows correlation<br>of 1) |
|            | <b>lmer(rating ~condition +<br/>(1+condition subject_nr)</b>                         | <b>lmer(rating<br/>~(1+condition subject_nr)</b> | included                                                                   |
| Age        | lmer(rating ~condition +<br>(1+condition subject_nr) +<br>(1+condition stimulus_nr)) |                                                  | Boundary fit<br>(overfitting;<br>stimulus_nr<br>shows correlation<br>of 1) |
|            | lmer(rating ~condition +<br>(1+condition subject_nr)                                 |                                                  | Boundary fit<br>(overfitting;<br>stimulus_nr<br>shows correlation<br>of 1) |
|            | <b>lmer(rating ~condition +<br/>(1 subject_nr)</b>                                   | <b>lmer(rating ~(1 subject_nr)</b>               | included                                                                   |
